# Supplementary material for: Multicentre, randomised controlled trial of PDSAFE, a physiotherapist-delivered fall prevention programme for people with Parkinson’s
Source: PubMed Central journal article supplement — J Neurol Neurosurg Psychiatry. 2019 Apr 3;90(7):774–82. doi: 10.1136/jnnp-2018-319448 (PMC6585265; doi:10.1136/jnnp-2018-319448), 2019-04-03
Supplement: jnnp-2018-319448supp001.pdf [file jnnp-2018-319448supp001.pdf]

**Table : Diary completion for falling outcomes during baseline (pre-randomisation), 0 to 6 months and 6 to 12 months post randomisation**

| RANDOMISATION                                                                       |                                                                      |               | Intervention     | Control           |
|-------------------------------------------------------------------------------------|----------------------------------------------------------------------|---------------|------------------|-------------------|
|                                                                                     | Number                                                               |               | 238              | 236               |
| Baseline                                                                            | Number with no diaries                                               |               | 1/238            | 0/236             |
|                                                                                     | Number of diary days amongst those with diaries                      | median        | 92               | 92                |
|                                                                                     |                                                                      | IQR           | 90-92            | 90-92             |
|                                                                                     |                                                                      | min-max       | 12-92<br>(n=237) | 26-92<br>(n=236)  |
| Number with complete diaries                                                        |                                                                      | 196/238 (82%) | 198/236 (84%)    |                   |
| 0 to 6 months post randomisation                                                    | Number entering 0-6 months period                                    |               | 238              | 236               |
|                                                                                     | Number with no diaries                                               |               | 7/238 (3%)       | 6/236 (3%)        |
|                                                                                     | Number in falls rate ratio analysis                                  |               | 231/238 (97%)    | 230/236 (98%)     |
|                                                                                     | Number exiting (died or withdrawn from follow-up during 0-6 months)  |               | 32/238 (13%)     | 17/236 (7%)       |
|                                                                                     | Number not exiting with no diaries                                   |               | 2/206 (1%)       | 3/219 (1%)        |
|                                                                                     | Number of diary days amongst those not exiting with diary days       | median        | 182              | 182               |
|                                                                                     |                                                                      | IQR           | 153-183          | 174-183           |
|                                                                                     |                                                                      | min-max       | 3-184<br>(n=204) | 29-184<br>(n=216) |
| Number with complete diaries                                                        |                                                                      | 130/238 (55%) | 158/236 (67%)    |                   |
| Number with ≥ 50% diaries Included in primary analysis                              |                                                                      | 203/238 (85%) | 211/236 (89%)    |                   |
| Number in follow-up at 6 months                                                     |                                                                      | 206           | 219              |                   |
| Number not followed-up after 6 months because they were randomised after 01/05/2106 | Southampton                                                          |               | 5                | 4                 |
|                                                                                     | Portsmouth                                                           |               | 7                | 6                 |
|                                                                                     | Bournemouth                                                          |               | 2                | 2                 |
|                                                                                     | Newcastle                                                            |               | 15               | 13                |
|                                                                                     | Hampshire                                                            |               | 13               | 18                |
|                                                                                     | Plymouth                                                             |               | 10               | 11                |
|                                                                                     | Cornwall                                                             |               | 16               | 15                |
|                                                                                     | TOTAL                                                                |               | 68               | 69                |
| 6 to 12 months post randomisation                                                   | Number entering 6-12 months period                                   |               | 138              | 150               |
|                                                                                     | Number with no diaries                                               |               | 11/138 (8%)      | 3/150 (2%)        |
|                                                                                     | Number in falls rate ratio analysis                                  |               | 127/152 (84%)    | 147/162 (91%)     |
|                                                                                     | Number exiting (died or withdrawn from follow-up during 6-12 months) |               | 11/138 (8%)      | 7/150 (5%)        |
|                                                                                     | Number not exiting with no diaries                                   |               | 19/141 (14%)     | 14/155 (9%)       |
|                                                                                     | Number of diary days amongst those not exiting with diary days       | median        | 180              | 180               |
|                                                                                     |                                                                      | IQR           | 151-183          | 153-183           |
|                                                                                     |                                                                      | min-max       | 4-184<br>(n=122) | 30-184<br>(n=141) |
| Number with complete diaries                                                        |                                                                      | 94/138 (68%)  | 112/150 (75%)    |                   |
| Number with ≥ 50% diaries Included in repeat falling analysis                       |                                                                      | 114/138 (83%) | 132/150 (8%)     |                   |
