# Supplementary material for: Multicentre, randomised controlled trial of PDSAFE, a physiotherapist-delivered fall prevention programme for people with Parkinson’s
Source: PubMed Central journal article supplement — J Neurol Neurosurg Psychiatry. 2019 Apr 3;90(7):774–82. doi: 10.1136/jnnp-2018-319448 (PMC6585265; doi:10.1136/jnnp-2018-319448), 2019-04-03
Supplement: jnnp-2018-319448supp002.pdf [file jnnp-2018-319448supp002.pdf]

## SUBGROUPS DEFINED BY HOEHN AND YAHR GROUPS: INTENTION-TO-TREAT ANALYSES OF FALLING OUTCOMES

|                                                   | H&Y               | Period (months) | PDSafe            | Control                         | PDSafe/control**   | p**                 | Interaction p** |       |       |
|---------------------------------------------------|-------------------|-----------------|-------------------|---------------------------------|--------------------|---------------------|-----------------|-------|-------|
| <b>Repeat falling* restricted to ≥50% diaries</b> |                   |                 | <b>Number (%)</b> |                                 | <b>OR (95% CI)</b> |                     |                 |       |       |
|                                                   | <b>1</b>          | <b>pre</b>      | 5/26<br>(19%)     | 8/30<br>(27%)                   |                    |                     | 0.267           |       |       |
|                                                   |                   | <b>0-6</b>      | 8/35<br>(35%)     | 10/28<br>(36%)                  | 0.78 (0.21, 2.80)  | 0.320               |                 |       |       |
|                                                   | <b>2</b>          | <b>pre</b>      | 34/76<br>(45%)    | 17/55<br>(31%)                  |                    |                     |                 |       |       |
|                                                   |                   | <b>0-6</b>      | 31/71<br>(44%)    | 23/53<br>(43%)                  | 0.78 (0.33, 1.84)  | 0.571               |                 |       |       |
|                                                   | <b>3</b>          | <b>pre</b>      | 65/86<br>(76%)    | 59/98<br>(60%)                  |                    |                     |                 |       |       |
|                                                   |                   | <b>0-6</b>      | 71/90<br>(79%)    | 58/67<br>(87%)                  | 1.71 (0.80, 3.66)  | 0.163               |                 |       |       |
|                                                   | <b>4</b>          | <b>pre</b>      | 21/29<br>(72%)    | 23/35<br>(66%)                  |                    |                     |                 |       |       |
|                                                   |                   | <b>0-6</b>      | 21/23<br>(91%)    | 24/32<br>(75%)                  | 4.01 (0.62, 25.92) | 0.145               |                 |       |       |
|                                                   | <b>Fall rates</b> |                 |                   | <b>Falls/person/6 months***</b> |                    | <b>FRR (95% CI)</b> |                 |       |       |
|                                                   |                   | <b>1</b>        | <b>pre</b>        | 2.0<br>(n=26)                   | 2.1<br>(n=30)      |                     |                 |       | 0.828 |
|                                                   |                   |                 | <b>0-6</b>        | 1.3<br>(n=25)                   | 1.3<br>(n=30)      | 0.85 (0.41, 1.73)   |                 | 0.648 |       |
| <b>2</b>                                          |                   | <b>pre</b>      | 3.1<br>(n=78)     | 2.5<br>(n=56)                   |                    |                     |                 |       |       |
|                                                   |                   | <b>0-6</b>      | 1.8<br>(n=77)     | 1.8<br>(n=56)                   | 0.87 (0.58, 1.30)  | 0.493               |                 |       |       |
| <b>3</b>                                          |                   | <b>pre</b>      | 6.2<br>(n=102)    | 3.4<br>(n=112)                  |                    |                     |                 |       |       |
|                                                   |                   | <b>0-6</b>      | 5.4<br>(n=98)     | 3.4<br>(n=109)                  | 1.01 (0.77, 1.32)  | 0.957               |                 |       |       |
| <b>4</b>                                          |                   | <b>pre</b>      | 8.7<br>(n=31)     | 6.3<br>(n=38)                   |                    |                     |                 |       |       |
|                                                   |                   | <b>0-6</b>      | 7.6<br>(n=31)     | 5.4<br>(n=35)                   | 1.11 (0.73, 1.71)  | 0.623               |                 |       |       |

\* For participants with incomplete diaries and < 2 falls during 0-6 or 6-12 months, PDSAFE records checked.

\*\* Controlled for site, age, gender, repeat falling or not in the year prior to screening, log number of falls in the year prior to falling, log rate of falling in the pre randomisation falls collection period, and Hoehn and Yahr.

\*\*\* Geometric mean of individual fall rates with 0.5 added to all numerators
